# Supplementary material for: Dispersive micro-solid phase extraction based on Fe3O4@SiO2@Ti-MOF as a magnetic nanocomposite sorbent for the trace analysis of caffeic acid in the medical extracts of plants and water samples prior to HPLC-UV analysis
Source: Royal Society of Chemistry journal article supplement (doi:10.1039/c9an00120d), 2019-01-01
Supplement: c9an00120d1.pdf [file c9an00120d1.pdf]

## Electronic Supplementary Information

---

### **Dispersive micro-solid phase extraction based on Fe<sub>3</sub>O<sub>4</sub>@SiO<sub>2</sub>@Ti-MOF as a magnetic nanocomposite sorbent for the trace analysis of caffeic acid in the medical extracts of plants and water samples prior to HPLC-UV analysis**

Zohreh Moradi <sup>a</sup>, Ebrahim Alipanahpour Dil <sup>a</sup> and Arash Asfaram <sup>\*b</sup>

<sup>a</sup> *Department of Chemistry, Yasouj University, Yasouj 75918-74831, Iran.*

<sup>b</sup> *Medicinal Plants Research Center, Yasuj University of Medical Sciences, Yasuj, Iran.*

---

---

\* Corresponding author: E-mail address:  
[arash.asfaram@yums.ac.ir](mailto:arash.asfaram@yums.ac.ir) (A. Asfaram)

## Contents

### 1. Figures

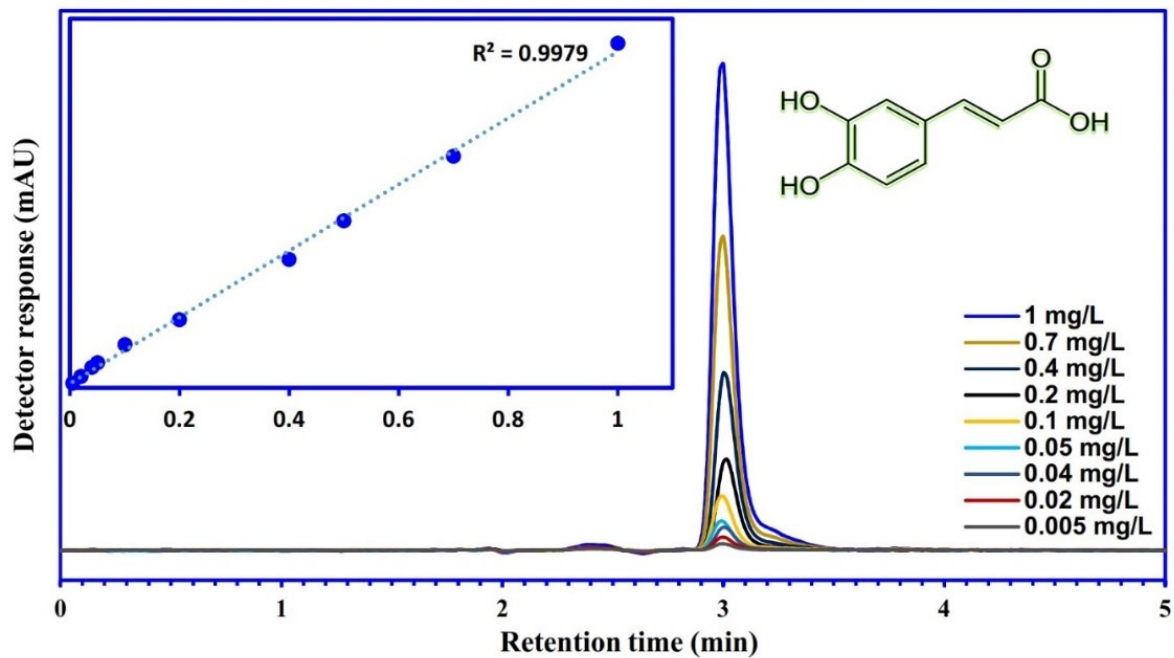

**Fig. S1.** Calibration curve of caffeic acid at different concentrations and its chemical structure (inset).

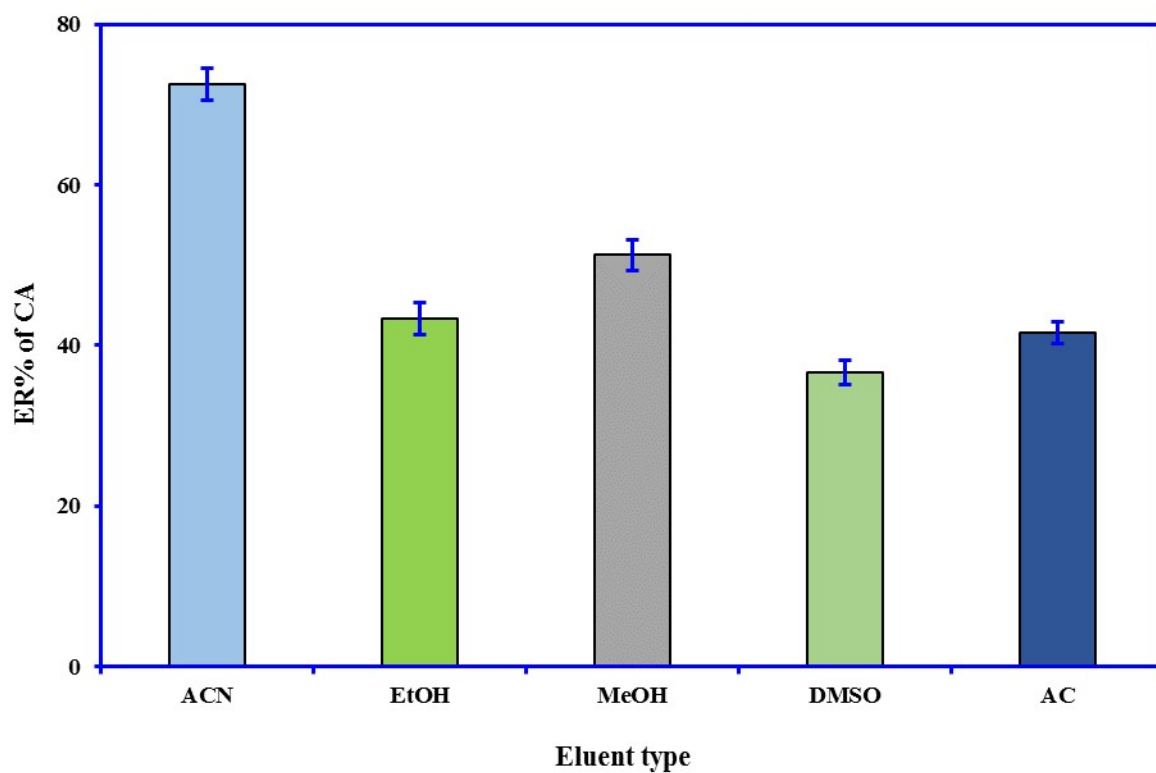

**Fig. S2.** Effect of different types of desorption (eluent) solvent on the extraction of CA with  $\text{Fe}_3\text{O}_4@\text{SiO}_2@\text{Ti-MOF}$  nanocomposites (conditions: initial pH value of 6.0 for sample solution, magnetic nano-sorbent mass of 12 mg, sonication, vortex, and desorption time of 2.0, 2.0, and 5 min, respectively, and 150  $\mu\text{L}$  of eluting phase at room temperature).

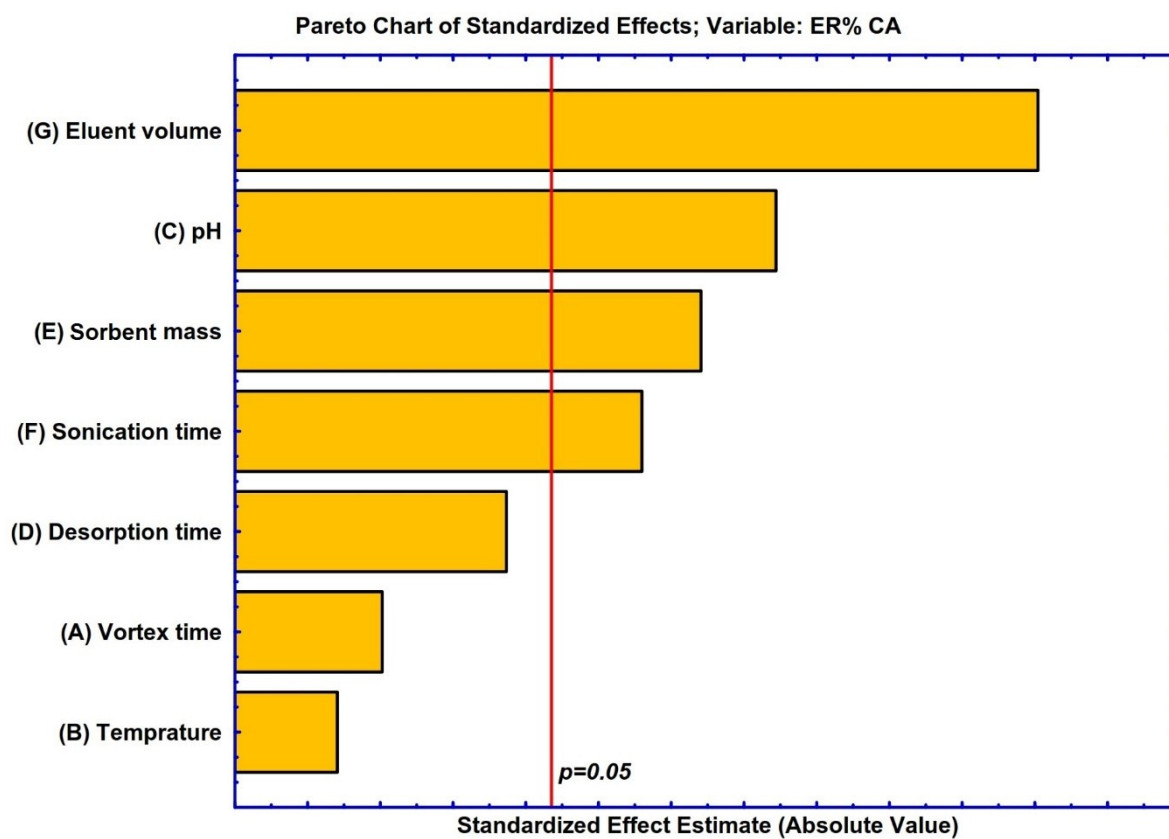

**Fig. S3.** Standardized ( $P = 0.05$ ) Pareto chart showing the estimated effects of parameters obtained from the Plackett-Burman screening design for CA.

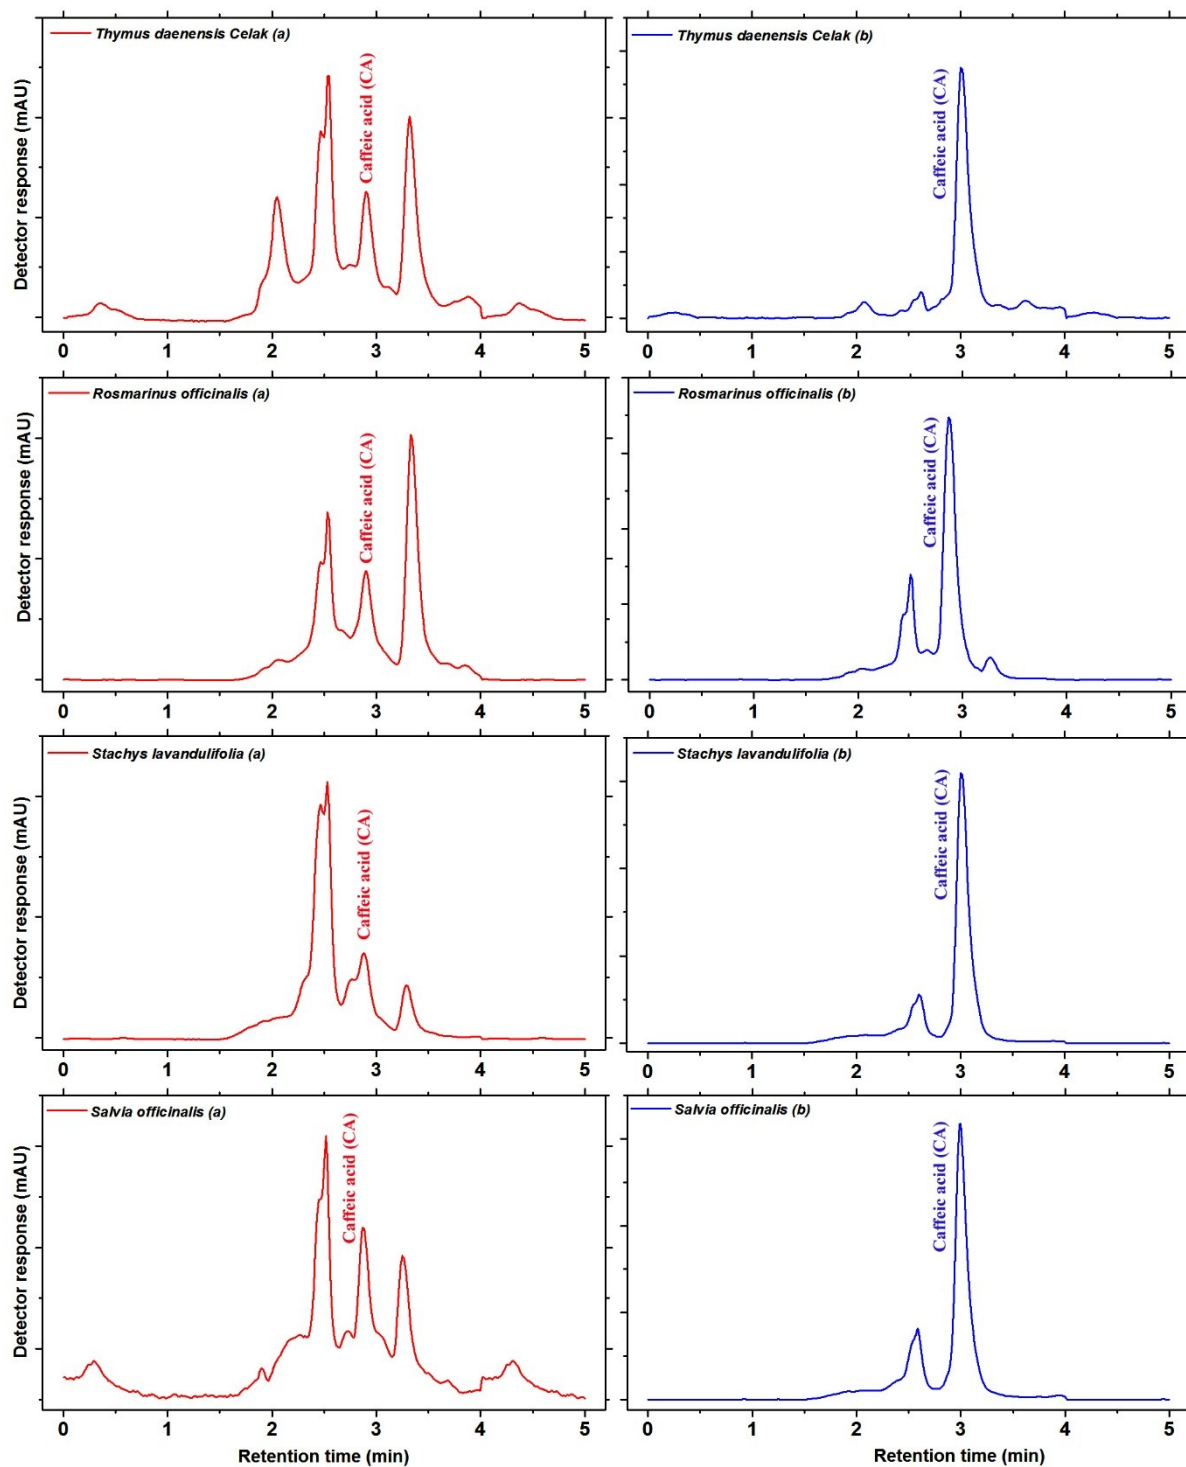

**Fig. S4.** Chromatograms of methanolic extract of plants before (a) and after (b) microextraction under optimal conditions.

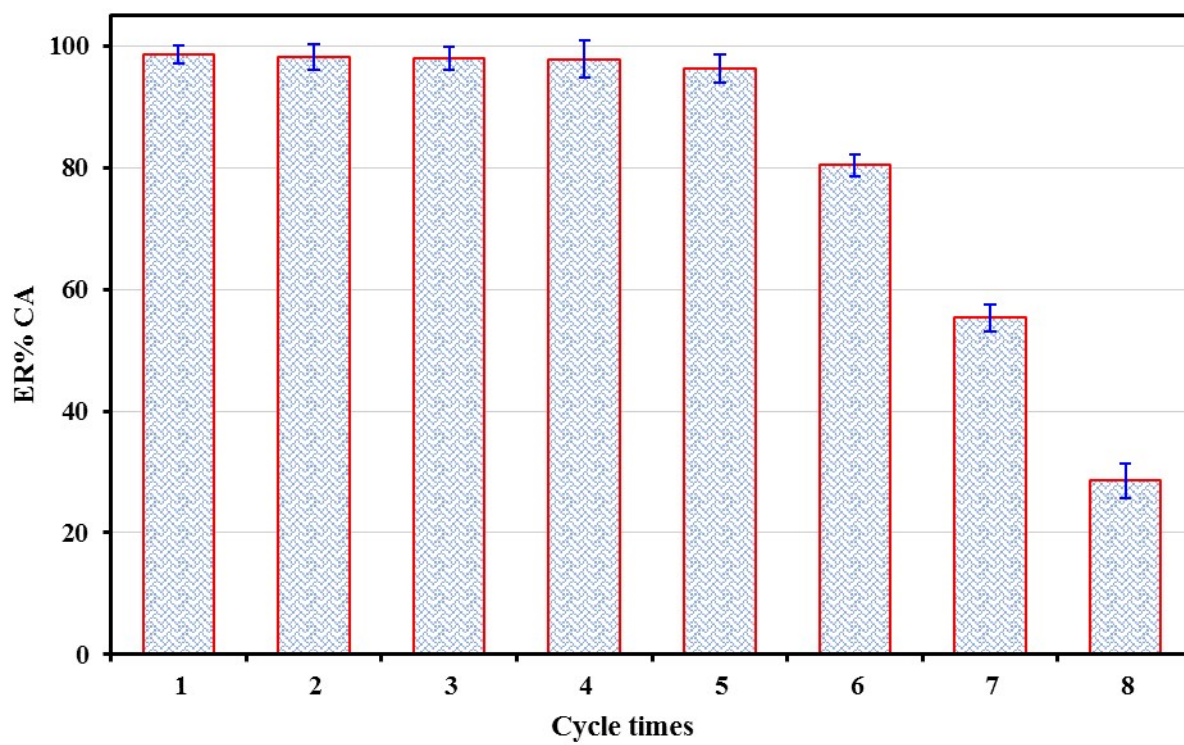

**Fig. S5.** Reusability tests of the  $\text{Fe}_3\text{O}_4@\text{SiO}_2@\text{Ti-MOF-NCs}$  for the recovery efficiency toward CA.

## 2. Tables

**Table. S1.** Analysis of variance (ANOVA) for response surface quadratic model of CA extraction determined from CCD.

| Source                        | Sum of squares | Degree of freedom | Mean square | F value | P value  |
|-------------------------------|----------------|-------------------|-------------|---------|----------|
| Model                         | 5496.04        | 14                | 392.57      | 307.33  | < 0.0001 |
| X <sub>1</sub>                | 840.50         | 1                 | 840.50      | 657.98  | < 0.0001 |
| X <sub>2</sub>                | 620.22         | 1                 | 620.22      | 485.54  | < 0.0001 |
| X <sub>3</sub>                | 61.52          | 1                 | 61.52       | 48.16   | 0.0009   |
| X <sub>4</sub>                | 51.21          | 1                 | 51.21       | 40.09   | 0.0015   |
| X <sub>1</sub> X <sub>2</sub> | 35.53          | 1                 | 35.53       | 27.82   | 0.0033   |
| X <sub>1</sub> X <sub>3</sub> | 44.70          | 1                 | 44.70       | 34.99   | 0.0020   |
| X <sub>1</sub> X <sub>4</sub> | 26.09          | 1                 | 26.09       | 20.42   | 0.0060   |
| X <sub>2</sub> X <sub>3</sub> | 321.19         | 1                 | 321.19      | 251.44  | < 0.0001 |
| X <sub>2</sub> X <sub>4</sub> | 56.14          | 1                 | 56.14       | 43.95   | 0.0012   |
| X <sub>3</sub> X <sub>4</sub> | 79.15          | 1                 | 79.15       | 61.97   | 0.0005   |
| X <sub>1</sub> <sup>2</sup>   | 20.06          | 1                 | 20.06       | 15.71   | 0.0107   |
| X <sub>2</sub> <sup>2</sup>   | 29.53          | 1                 | 29.53       | 23.12   | 0.0050   |
| X <sub>3</sub> <sup>2</sup>   | 832.46         | 1                 | 832.46      | 651.69  | < 0.0001 |
| X <sub>4</sub> <sup>2</sup>   | 1248.99        | 1                 | 1248.99     | 977.77  | < 0.0001 |
| Residual                      | 6.39           | 5                 | 1.28        |         |          |
| Lack of Fit                   | 1.67           | 2                 | 0.84        | 0.53    | 0.6342   |
| Pure Error                    | 4.71           | 3                 | 1.57        |         |          |
| Corr. Total                   | 5502.43        | 19                |             |         |          |

**Table. S2.** Figure of merits for MD- $\mu$ -SPE of CA.

| <b>Quantitative analysis</b>                          | <b>Values</b> |
|-------------------------------------------------------|---------------|
| Sample volume (mL)                                    | 15            |
| Extraction solvent (mL)                               | 0.24          |
| Linear range (ng mL <sup>-1</sup> )                   | 0.15-3200     |
| Coefficients of determination (R <sup>2</sup> )       | >0.987        |
| Limit of detections (LODs) (ng mL <sup>-1</sup> )     | 0.016-0.021   |
| limit of quantification (LOQs) (ng mL <sup>-1</sup> ) | 0.052-0.068   |
| Enrichment factors (EFs)                              | 105.92-132.03 |
| Preconcentration factor (PF)                          | 62.5          |
| Reproducibility (RSD, %)                              | 3.65-8.66     |
| Repeatability (RSD, %)                                | 1.84-5.54     |



**Table S3.** Langmuir, Freundlich isotherm constants, and separation factors ( $R_L$ ) for the sorption of CA onto  $\text{Fe}_3\text{O}_4@\text{SiO}_2@\text{Ti-MOF-NCs}$  sorbent.

| <b>Isotherm</b>                                                          | <b>Freundlich isotherm</b>             |                                      |                         | <b>Langmuir isotherm</b>                    |                                      |                         |                         |
|--------------------------------------------------------------------------|----------------------------------------|--------------------------------------|-------------------------|---------------------------------------------|--------------------------------------|-------------------------|-------------------------|
| Equation                                                                 | $\log q_e = \log K_F + (1/n) \log C_e$ |                                      |                         | $C_e/q_e = (1/Q_{\max} K_L) + C_e/Q_{\max}$ |                                      |                         |                         |
|                                                                          |                                        |                                      |                         | $R_L = (1)/(1 + K_L C_0)$                   |                                      |                         |                         |
| Plot                                                                     | $\log q_e$ vs. $\log C_e$              |                                      |                         | $C_e/q_e$ vs. $C_e$                         |                                      |                         |                         |
| <b>Parameters</b>                                                        | <b>1/n</b>                             | <b><math>K_F</math></b>              | <b><math>R^2</math></b> | <b><math>Q_{\max}</math></b>                | <b><math>K_L</math></b>              | <b><math>R^2</math></b> | <b><math>R_L</math></b> |
| <b>Unit</b>                                                              | -                                      | <b><math>\text{L mg}^{-1}</math></b> | -                       | <b><math>\text{mg g}^{-1}</math></b>        | <b><math>\text{L mg}^{-1}</math></b> | -                       | -                       |
| <b><math>\text{Fe}_3\text{O}_4@\text{SiO}_2@\text{Ti-MOF-NCs}</math></b> | 0.769                                  | 5.053                                | 0.968                   | 183.71                                      | 0.321                                | 0.996                   | 0.055-0.342             |
